# Supplementary material for: Role of CrRLK1L Cell Wall Sensors HERCULES1 and 2, THESEUS1, and FERONIA in Growth Adaptation Triggered by Heavy Metals and Trace Elements
Source: PubMed Central journal article supplement (PMC5594065; doi:10.3389/fpls.2017.01554), 2017-09-07
Supplement: Presentation_1.pdf [file Presentation_1.pdf]

## Supplementary Tables and Figures

Role of CrRLK1L cell wall sensors HERCULES1 and 2, THESEUS1, and FERONIA in growth adaptation triggered by heavy metals and trace elements

**Supplementary Table 1** Medium compositions

| Hoaglands medium                               | mg/L   | 1x      | 1/10     |
|------------------------------------------------|--------|---------|----------|
| KNO <sub>3</sub>                               | 606.6  | 6 mM    | 0.6 mM   |
| Ca(NO <sub>3</sub> ) <sub>2</sub>              | 656.4  | 4 mM    | 0.4 mM   |
| MgSO <sub>4</sub> anhydrous                    | 240.8  | 2 mM    | 0.2 mM   |
| NH <sub>4</sub> H <sub>2</sub> PO <sub>4</sub> | 115.03 | 1 mM    | 0.1 mM   |
| H <sub>3</sub> BO <sub>3</sub>                 | 2.86   | 46 μM   | 4.6 μM   |
| Na <sub>2</sub> EDTA·2H <sub>2</sub> O         | 3.35   | 12 μM   | 1.2 μM   |
| MoO <sub>3</sub>                               | 0.016  | 11 μM   | 1.1 μM   |
| FeSO <sub>4</sub> ·7H <sub>2</sub> O           | 2.5    | 8 μM    | 0.8 μM   |
| MnCl <sub>2</sub> ·4H <sub>2</sub> O           | 1.81   | 9 μM    | 0.9 μM   |
| ZnSO <sub>4</sub> ·7H <sub>2</sub> O           | 0.22   | 0.77 μM | 0.077 μM |
| CuSO <sub>4</sub> ·5H <sub>2</sub> O           | 0.08   | 0.32 μM | 0.032 μM |

| MS medium                                           | mg/L  | 1x       |
|-----------------------------------------------------|-------|----------|
| CaCl <sub>2</sub>                                   | 332.0 | 3 mM     |
| KH <sub>2</sub> PO <sub>4</sub>                     | 170   | 1.3 mM   |
| KNO <sub>3</sub>                                    | 1900  | 18.8 mM  |
| MgSO <sub>4</sub>                                   | 180.5 | 1.5 mM   |
| NH <sub>4</sub> NO <sub>3</sub>                     | 1650  | 20.6 mM  |
| CoCl <sub>2</sub> ·6H <sub>2</sub> O                | 0.025 | 0.1 μM   |
| CuSO <sub>4</sub> ·5H <sub>2</sub> O                | 0.025 | 0.1 μM   |
| FeNaEDTA                                            | 36.7  | 100 μM   |
| H <sub>3</sub> BO <sub>3</sub>                      | 6.2   | 100.3 μM |
| KI                                                  | 0.83  | 5.0 μM   |
| MnSO <sub>4</sub> ·H <sub>2</sub> O                 | 16.9  | 100 μM   |
| Na <sub>2</sub> MoO <sub>4</sub> ·2H <sub>2</sub> O | 0.25  | 1.0 μM   |
| ZnSO <sub>4</sub> ·7H <sub>2</sub> O                | 8.6   | 29.9 μM  |

**Supplementary Table 2** Primers for RT-qPCR

| <b>Gene name</b>                                | <b>AGI number</b> | <b>forward 5'-3'</b>     | <b>reverse 5'-3'</b>      |
|-------------------------------------------------|-------------------|--------------------------|---------------------------|
| <b>AP2M</b><br>clathrin adaptor complex subunit | At5g46630         | GTTTGGGAGAAGAGCGGTTA     | CTGATGTCACTGAACCTGAACTG   |
| <b>FER</b>                                      | At3g51550         | AGTTTGCTGAAACCGCGATG     | TGGAGCTGCAACGCAAATTC      |
| <b>THE1</b>                                     | At5g54380         | TTCGGTGGTCTTTGTCAACG     | AACGCCAAAGCTTGATCAGG      |
| <b>HERK1</b>                                    | At3g46290         | TTCAGCCATTGGTTCGTTGC     | TCGAAAACGGCATCCAAGTC      |
| <b>EDGP</b><br>dermal glycoprotein- like        | At5g19110         | CTACAATGCTCTTGCTCAGTC    | ACCGTCGATAAACGCCAAAC      |
| <b>TUB9</b>                                     | At4g20890         | GTACCTTGAAGCTTGCTAATCCTA | GTTCTGGACGTTTCATCATCTGTTC |
|                                                 |                   |                          |                           |
|                                                 |                   |                          |                           |

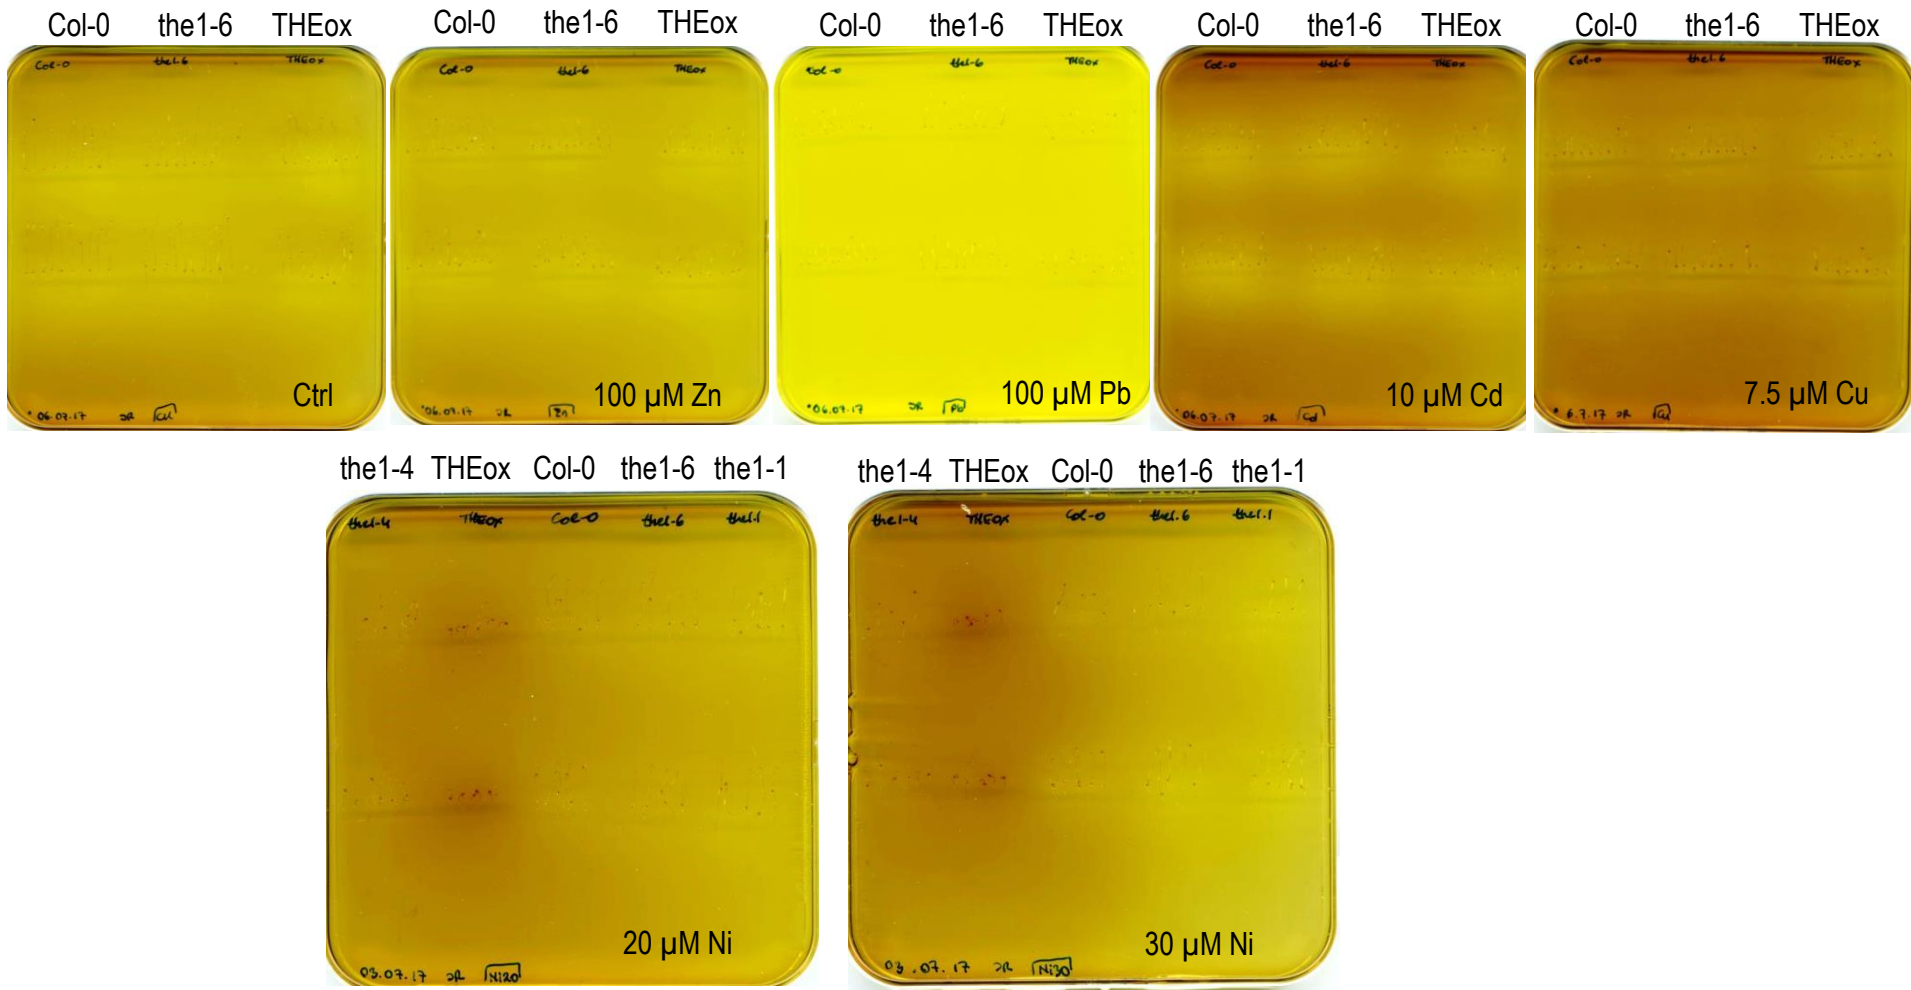

**Figure S1** pH indicator experiments of THE1 alleles on control and metalloid containing media.
